# Supplementary material for: Selection of Specific Peptides for Coccidioides spp. Obtained from Antigenic Fractions through SDS-PAGE and Western Blot Methods by the Recognition of Sera from Patients with Coccidioidomycosis
Source: MDPI journal article supplement (doi:10.3390/molecules23123145), 2018-11-30
Supplement: s1 [file s1]

# Supplementary

## Selection of Specific Peptides for *Coccidioides* spp. Obtained from Antigenic Fractions through SDS-PAGE and Western Blot Methods by the Recognition of Sera from Patients with Coccidioidomycosis

Esperanza Duarte Escalante <sup>1</sup>, María Guadalupe Frías De León <sup>2</sup>, Luz Gisela Martínez García <sup>1</sup>, Jorge Herrera <sup>3</sup>, Gustavo Acosta Altamirano <sup>2</sup>, Carlos Cabello <sup>4</sup>, Gabriel Palma <sup>4</sup>, María del Rocío Reyes Montes <sup>1,\*</sup>

**Table S2. Peptides of *Coccidioides* spp. corresponding to the 100 kDa band.**

| Peptide         | Specie                                                                        | Accession                        |
|-----------------|-------------------------------------------------------------------------------|----------------------------------|
| ISVSNIVVDQCSK   | proline-rich antigen [ <i>Coccidioides posadasii</i> C735 delta SOWgp]        | XP_003069153.1                   |
|                 | proline-rich antigen [ <i>Coccidioides immitis</i> RS]                        | XP_001240075.1                   |
|                 | proline rich antigen 2 [ <i>Coccidioides immitis</i> RS]                      | XP_001239939.1                   |
|                 | proline rich antigen 2 [ <i>Coccidioides posadasii</i> C735 delta SOWgp],     | XP_003067448.1                   |
|                 | proline-rich-antigen, partial [ <i>Coccidioides posadasii</i> ],              | AFL65837.1                       |
|                 | proline-rich-antigen, partial [ <i>Coccidioides posadasii</i> ],              | AFL65836.1                       |
|                 | proline-rich antigen, partial [ <i>Coccidioides immitis</i> ],                | AFR78204.1                       |
|                 | proline-rich antigen, partial [ <i>Coccidioides posadasii</i> ],              | AFR78201.1                       |
|                 | proline-rich antigen, partial [ <i>Coccidioides posadasii</i> ],              | AFL65860.1                       |
|                 | Prp 2 CRoW domain <i>Coccidioides posadasii</i> ,                             | AAP84614.1                       |
|                 | Ag2/Pra CRoW domain                                                           | AAP84613.1                       |
| NIIYVATLGSSPSIR | secreted dipeptidyl peptidase [ <i>Coccidioides posadasii</i> str. Silveira], | EFW16303.1                       |
|                 | dipeptidyl-peptidase 5 [ <i>Coccidioides posadasii</i> RMSCC 3488],           | KMM67819.1                       |
|                 | Dipeptidyl-peptidase V precursor, putative [ <i>Coccidioides</i>              | XP_003070019.1<br>XP_001242886.1 |

|                      |                                                                                                                                                                                                                                                                                                                                                                                                                                                                |                                                                                          |
|----------------------|----------------------------------------------------------------------------------------------------------------------------------------------------------------------------------------------------------------------------------------------------------------------------------------------------------------------------------------------------------------------------------------------------------------------------------------------------------------|------------------------------------------------------------------------------------------|
|                      | <i>posadasii</i> C735 delta SOWgp],<br>secreted dipeptidyl peptidase [ <i>Coccidioides immitis</i> RS],<br>dipeptidyl-peptidase V [ <i>Coccidioides immitis</i> RMSCC 2394],<br>dipeptidyl-peptidase V [ <i>Coccidioides immitis</i> H538.4]                                                                                                                                                                                                                   | KMP03935.1<br>KMU86093.1                                                                 |
| VLVTGTSLWSNTLYYTTGPR | secreted dipeptidyl peptidase [ <i>Coccidioides posadasii</i> str. Silveira],<br>dipeptidyl-peptidase 5 [ <i>Coccidioides posadasii</i> RMSCC 3488],<br>Dipeptidyl-peptidase V precursor, putative [ <i>Coccidioides posadasii</i> C735 delta SOWgp],<br>secreted dipeptidyl peptidase [ <i>Coccidioides immitis</i> RS],<br>dipeptidyl-peptidase V [ <i>Coccidioides immitis</i> RMSCC 2394],<br>dipeptidyl-peptidase V [ <i>Coccidioides immitis</i> H538.4] | EFW16303.1<br>KMM67819.1<br>XP_003070019.1<br>XP_001242886.1<br>KMP03935.1<br>KMU86093.1 |
| NVGSVSSYSFLGR        | secreted dipeptidyl peptidase [ <i>Coccidioides posadasii</i> str. Silveira],<br>dipeptidyl-peptidase 5 [ <i>Coccidioides posadasii</i> RMSCC 3488],<br>Dipeptidyl-peptidase V precursor, putative [ <i>Coccidioides posadasii</i> C735 delta SOWgp],<br>secreted dipeptidyl peptidase [ <i>Coccidioides immitis</i> RS],<br>dipeptidyl-peptidase V [ <i>Coccidioides immitis</i> RMSCC 2394],<br>dipeptidyl-peptidase V [ <i>Coccidioides immitis</i> H538.4] | EFW16303.1<br>KMM67819.1<br>XP_003070019.1<br>XP_001242886.1<br>KMP03935.1<br>KMU86093.1 |
| QEVQAWIVKPFNDPNKK    | secreted dipeptidyl peptidase [ <i>Coccidioides posadasii</i> str. Silveira],<br>dipeptidyl-peptidase 5 [ <i>Coccidioides posadasii</i> RMSCC 3488],<br>Dipeptidyl-peptidase V precursor, putative [ <i>Coccidioides posadasii</i> C735 delta SOWgp],<br>secreted dipeptidyl peptidase [ <i>Coccidioides immitis</i> RS],<br>dipeptidyl-peptidase V [ <i>Coccidioides immitis</i> H538.4],<br>dipeptidyl-peptidase V [ <i>Coccidioides immitis</i> RMSCC 2394] | EFW16303.1<br>KMM67819.1<br>XP_003070019.1<br>XP_001242886.1<br>KMU86093.1<br>KMP03935.1 |
| NIIYVATLGSSPSIR      | secreted dipeptidyl peptidase [ <i>Coccidioides posadasii</i> str.                                                                                                                                                                                                                                                                                                                                                                                             | EFW16303.1                                                                               |

|                      |                                                                                                                                                                                                                                                                                                                                                                                                                                                                |                                                                                          |
|----------------------|----------------------------------------------------------------------------------------------------------------------------------------------------------------------------------------------------------------------------------------------------------------------------------------------------------------------------------------------------------------------------------------------------------------------------------------------------------------|------------------------------------------------------------------------------------------|
|                      | Silveira],<br>dipeptidyl-peptidase 5 [ <i>Coccidioides posadasii</i> RMSCC 3488],<br>Dipeptidyl-peptidase V precursor, putative [ <i>Coccidioides posadasii</i> C735 delta SOWgp],<br>secreted dipeptidyl peptidase [ <i>Coccidioides immitis</i> RS],<br>dipeptidyl-peptidase V [ <i>Coccidioides immitis</i> RMSCC 2394],<br>dipeptidyl-peptidase V [ <i>Coccidioides immitis</i> H538.4],                                                                   | KMM67819.1<br>XP_003070019.1<br>XP_001242886.1<br>KMP03935.1<br>KMU86093.1               |
| QEVQAWIVKPENFDPNKK   | secreted dipeptidyl peptidase [ <i>Coccidioides posadasii</i> str. Silveira],<br>dipeptidyl-peptidase 5 [ <i>Coccidioides posadasii</i> RMSCC 3488],<br>Dipeptidyl-peptidase V precursor, putative [ <i>Coccidioides posadasii</i> C735 delta SOWgp],<br>secreted dipeptidyl peptidase [ <i>Coccidioides immitis</i> RS],<br>dipeptidyl-peptidase V [ <i>Coccidioides immitis</i> H538.4],<br>dipeptidyl-peptidase V [ <i>Coccidioides immitis</i> RMSCC 2394] | EFW16303.1<br>KMM67819.1<br>XP_003070019.1<br>XP_001242886.1<br>KMU86093.1<br>KMP03935.1 |
| TPQLVIHNDLDFR        | secreted dipeptidyl peptidase [ <i>Coccidioides posadasii</i> str. Silveira],<br>dipeptidyl-peptidase 5 [ <i>Coccidioides posadasii</i> RMSCC 3488],<br>Dipeptidyl-peptidase V precursor, putative [ <i>Coccidioides posadasii</i> C735 delta SOWgp],<br>secreted dipeptidyl peptidase [ <i>Coccidioides immitis</i> RS],<br>dipeptidyl-peptidase V [ <i>Coccidioides immitis</i> RMSCC 2394]                                                                  | EFW16303.1<br>KMM67819.1<br>XP_003070019.1<br>XP_001242886.1<br>KMP03935.1               |
| NGLDVFLNIPYGQDTSGEHR | lipase, putative [ <i>Coccidioides posadasii</i> C735 delta SOWgp],<br>acetylcholinesterase [ <i>Coccidioides posadasii</i> str. Silveira],<br>hypothetical protein CIMG_00118 [ <i>Coccidioides immitis</i> RS],<br>carboxylesterase 2 [ <i>Coccidioides immitis</i> RMSCC 3703],<br>carboxylesterase 2 [ <i>Coccidioides immitis</i> H538.4]                                                                                                                 | XP_003066793.1<br>EFW18154.1<br>XP_001246347.2<br>KMU75838.1<br>KMU88343.1               |

---

**Table S3. Peptides of *Coccidioides* spp. corresponding to the 50 kDa band.**

| Peptide            | Specie                                                                                                                                                                    | Accession                                                                                |
|--------------------|---------------------------------------------------------------------------------------------------------------------------------------------------------------------------|------------------------------------------------------------------------------------------|
| DAITLANHAK         | CHA1 [ <i>Coccidioides posadasii</i> ]                                                                                                                                    | XP_003070371.1                                                                           |
| PSGEVIGNLDR        | CHA1 [ <i>Coccidioides posadasii</i> ,<br>hypothetical protein CIMG_08329 [ <i>Coccidioides immitis</i> ],                                                                | XP_003070371.1<br>XP_001241166.1                                                         |
| ETNVDGIIGPVAVPAAAR | acetamidase [ <i>Coccidioides immitis</i> ,<br>acetamidase, putative [ <i>Coccidioides posadasii</i> ,<br>hypothetical protein CISG_07260 [ <i>Coccidioides immitis</i> ] | KMP01873.1<br>XP_003065414.1<br>XP_001248096.1<br>KMU79093.1                             |
| NIIYVATLGSSPSIR    | secreted dipeptidyl peptidase [ <i>Coccidioides posadasii</i> , <i>C. immitis</i> ],<br>dipeptidyl-peptidase 5 [ <i>Coccidioides posadasii</i> , <i>C. immitis</i> ]      | EFW16303.1<br>KMM67819.1<br>XP_003070019.1<br>XP_001242886.1<br>KMP03935.1<br>KMU86093.1 |
| NEWVIDLESSK        | secreted dipeptidyl peptidase [ <i>Coccidioides posadasii</i> , <i>C. immitis</i> ],<br>dipeptidyl-peptidase 5 [ <i>Coccidioides posadasii</i> , <i>C. immitis</i> ]      | EFW16303.1<br>KMM67819.1<br>XP_003070019.1<br>XP_001242886.1<br>KMP03935.1<br>KMU86093.1 |

**Table S4. Peptides of *Coccidioides* spp. corresponding to the 37 kDa band.**

| Peptide                | Specie                                                                                                                                           | Accession      |
|------------------------|--------------------------------------------------------------------------------------------------------------------------------------------------|----------------|
| NIVITDYSTGK            | hypothetical protein CPAG_01767 [ <i>Coccidioides posadasii</i> RMSCC 3488]                                                                      | KMM65416.1     |
|                        | Glycosyl hydrolase family 16 protein [ <i>Coccidioides posadasii</i> C735 delta SOWgp]                                                           | XP_003066044.1 |
|                        | cell wall glucanase [ <i>Coccidioides immitis</i> RS]                                                                                            | XP_001247331.1 |
|                        | hypothetical protein CISG_03166 [ <i>Coccidioides immitis</i> RMSCC 3703]                                                                        | KMU72732.1     |
|                        | conserved hypothetical protein [ <i>Coccidioides posadasii</i> str. Silveira]                                                                    | EFW21954.1     |
|                        | ice nucleation protein [ <i>Coccidioides immitis</i> H538.4]                                                                                     | KMU83540.1     |
|                        |                                                                                                                                                  |                |
| ETNVDGIIGPVAVPAAAR     | acetamidase [ <i>Coccidioides immitis</i> RMSCC 2394],                                                                                           | KMP01873.1     |
|                        | acetamidase, putative [ <i>Coccidioides posadasii</i> C735 delta SOWgp],                                                                         | XP_003065414.1 |
|                        | acetamidase [ <i>Coccidioides immitis</i> RS],                                                                                                   | XP_001248096.1 |
|                        | hypothetical protein CISG_07260 [ <i>Coccidioides immitis</i> RMSCC 3703]                                                                        | KMU79094.1     |
| LPADQAINNADTFAIYAADSYR | metalloproteinase 4 [ <i>Coccidioides immitis</i> RS]                                                                                            | XP_001246737.2 |
| EASKDDANVSVQLSAVGNTMVK | neutral protease 2 precursor, putative [ <i>Coccidioides posadasii</i> C735 delta SOWgp], metalloproteinase 4 [ <i>Coccidioides posadasii</i> ], | XP_003066497.1 |
|                        | neutral protease 2 [ <i>Coccidioides immitis</i> RMSCC 3703],                                                                                    |                |
|                        | neutral protease 2 [ <i>Coccidioides immitis</i> H538.4],                                                                                        |                |
|                        | neutral protease 2 [ <i>Coccidioides posadasii</i> RMSCC 3488],                                                                                  |                |
|                        | metalloproteinase 4 [ <i>Coccidioides immitis</i> RS]                                                                                            |                |
|                        |                                                                                                                                                  |                |
| LPADQAINNADTFA         | neutral protease 2 precursor, putative [ <i>Coccidioides posadasii</i> C735 delta SOWgp],                                                        | XP_003066497.1 |
|                        | metalloproteinase 4 [ <i>Coccidioides posadasii</i> ],                                                                                           | AAV45754.1     |
|                        | neutral protease 2 [ <i>Coccidioides immitis</i> RMSCC 3703],                                                                                    | KMU76812.1     |
|                        | neutral protease 2 [ <i>Coccidioides immitis</i> H538.4],                                                                                        | KMU84566.1     |
|                        |                                                                                                                                                  | KMM66042.1     |

|                       |                                                                                                                                                                                                                                                                                                                                                                                                                                                   |                                                                                           |
|-----------------------|---------------------------------------------------------------------------------------------------------------------------------------------------------------------------------------------------------------------------------------------------------------------------------------------------------------------------------------------------------------------------------------------------------------------------------------------------|-------------------------------------------------------------------------------------------|
|                       | neutral protease 2 [ <i>Coccidioides posadasii</i> RMSCC 3488],<br>metalloproteinase 4 [ <i>Coccidioides immitis</i> RS]                                                                                                                                                                                                                                                                                                                          | XP_001246737.2                                                                            |
| LPADQAINNADTFAIYAA    | neutral protease 2 precursor putative [ <i>Coccidioides posadasii</i> C735 delta SOWgp], metalloproteinase 4 [ <i>Coccidioides posadasii</i> ],<br>neutral protease 2 [ <i>Coccidioides immitis</i> RMSCC 3703],<br>neutral protease 2 [ <i>Coccidioides immitis</i> H538.4],<br>neutral protease 2 [ <i>Coccidioides posadasii</i> RMSCC 3488],<br>metalloproteinase 4 [ <i>Coccidioides immitis</i> RS]                                         | XP_003066497.1<br>AA_Y45754.1<br>KMU76812.1<br>KMU84566.1<br>KMM66042.1<br>XP_001246737.2 |
| QYISVISPTYNLIANR      | wall-associated proteinase [ <i>Coccidioides posadasii</i> str. Silveira],<br>serine proteinase [ <i>Coccidioides posadasii</i> ],<br>wall-associated proteinase [ <i>Coccidioides posadasii</i> RMSCC 3488],<br>wall-associated proteinase precursor [ <i>Coccidioides posadasii</i> C735 delta SOWgp],<br>wall-associated proteinase [ <i>Coccidioides immitis</i> RS],<br>wall-associated proteinase [ <i>Coccidioides immitis</i> RMSCC 3703] | EFW19467.1<br>CAA44828.1<br>KMM71928.1<br>XP_003067238.1<br>XP_001239683.1<br>KMU74068.1  |
| VTDNEIHWYANQVVEGAPPMK | serine proteinase [ <i>Coccidioides posadasii</i> ],<br>Wall-associated proteinase precursor [ <i>Coccidioides posadasii</i> C735 delta SOWgp],<br>wall-associated proteinase [ <i>Coccidioides immitis</i> RS]                                                                                                                                                                                                                                   | CAA44828.1                                                                                |
| AVDPEITEPFR           | FAD-dependent oxygenase [ <i>Coccidioides posadasii</i> str. Silveira],<br>FAD-dependent oxygenase [ <i>Coccidioides immitis</i> RS],<br>hypothetical protein CIRG_05419 [ <i>Coccidioides immitis</i> RMSCC 2394],<br>FAD binding domain containing protein [ <i>Coccidioides posadasii</i> C735 delta SOWgp], hypothetical protein CIHG_04911 [ <i>Coccidioides immitis</i> H538.4]                                                             | EFW17327.1<br>XP_001246156.2<br>KMP05738.1<br>XP_003067765.1<br>KMU86971.1                |

---

**Table S5. Peptides of *Coccidioides* spp. corresponding to the 28 kDa band.**

| <b>Peptide</b>    | <b>Specie</b>                                                                                                                                                                                                                                                                                                      | <b>Accession</b>                                             |
|-------------------|--------------------------------------------------------------------------------------------------------------------------------------------------------------------------------------------------------------------------------------------------------------------------------------------------------------------|--------------------------------------------------------------|
| ATLPDLPYDYGALE    | <i>C. posadasii</i> (superoxide dismutase 2),<br><i>C. immitis</i> (superoxide dismutase)                                                                                                                                                                                                                          | KMM64900.1<br>XP_001247816.1                                 |
| PDLPYDYGALEPSISGR | superoxide dismutase 2 [ <i>Coccidioides posadasii</i> RMSCC 3488],<br>superoxide dismutase [ <i>Coccidioides immitis</i> RS]                                                                                                                                                                                      | KMM64900.1<br>XP_001247816.1                                 |
| DDKFGSLEEFK       | superoxide dismutase 2 [ <i>Coccidioides posadasii</i> RMSCC 3488]                                                                                                                                                                                                                                                 | KMM64900.1                                                   |
| AFDETNFYFDPK      | hypothetical protein CIMG_00536 [ <i>Coccidioides immitis</i> RS],<br>hypothetical protein CPC735_056990 [ <i>Coccidioides posadasii</i> C735 delta SOWgp],<br>hypothetical protein CISG_05614 [ <i>Coccidioides immitis</i> RMSCC 3703]                                                                           | XP_001246765.2<br>XP_003066474.1<br>KMU76781.1               |
| IPLALFNVDPR       | hypothetical protein CIMG_00536 [ <i>Coccidioides immitis</i> RS],<br>hypothetical protein CPC735_056990 [ <i>Coccidioides posadasii</i> C735 delta SOWgp]                                                                                                                                                         | XP_001246765.2<br>XP_003066474.1                             |
| PLALFNVDPR        | hypothetical protein CIMG_00536 [ <i>Coccidioides immitis</i> RS],<br>hypothetical protein CPC735_056990 [ <i>Coccidioides posadasii</i> C735 delta SOWgp]                                                                                                                                                         | XP_001246765.2<br>XP_003066474.1                             |
| LALFNVDPR         | hypothetical protein CIMG_00536 [ <i>Coccidioides immitis</i> RS],<br>hypothetical protein CPC735_056990 [ <i>Coccidioides posadasii</i> C735 delta SOWgp]                                                                                                                                                         | XP_001246765.2<br>XP_003066474.1                             |
| PALSGTATFDLK      | hypothetical protein CPAG_01767 [ <i>Coccidioides posadasii</i> RMSCC 3488],<br>Glycosyl hydrolase family 16 protein [ <i>Coccidioides posadasii</i> C735 delta SOWgp],<br>cell wall glucanase [ <i>Coccidioides immitis</i> RS],<br>conserved hypothetical protein [ <i>Coccidioides posadasii</i> str. Silveira] | KMM65416.1<br>XP_003066044.1<br>XP_001247331.1<br>EFW21954.1 |
| TVTPNDGNAR        | hypothetical protein CPAG_01767 [ <i>Coccidioides posadasii</i> RMSCC 3488],<br>Glycosyl hydrolase family 16 protein [ <i>Coccidioides posadasii</i> C735 delta SOWgp],                                                                                                                                            | KMM65416.1<br>XP_003066044.1                                 |

|                    |                                                                                                                                                                                                                                                                  |                                                              |
|--------------------|------------------------------------------------------------------------------------------------------------------------------------------------------------------------------------------------------------------------------------------------------------------|--------------------------------------------------------------|
|                    | cell wall glucanase [ <i>Coccidioides immitis</i> RS],<br>hypothetical protein CISG_03166 [ <i>Coccidioides immitis</i> RMSCC 3703],<br>conserved hypothetical protein [ <i>Coccidioides posadasii</i> str. Silveira]                                            | XP_001247331.1<br>KMU72732.1<br>EFW21954.1                   |
| VTYEEVASSLCGLK     | allergen Asp f 15 [ <i>Coccidioides immitis</i> RMSCC 3703],<br>CS antigen [ <i>Coccidioides posadasii</i> C735 delta SOWgp],<br>heat-stable antigen [ <i>Coccidioides immitis</i> RS]                                                                           | KMU74303.1<br>XP_003065978.1<br>XP_001247410.1               |
| TIFLTAIDHSNSGFNIAK | 19 kDa antigen [ <i>Coccidioides posadasii</i> ],<br>allergen Asp f 15 [ <i>Coccidioides immitis</i> RMSCC 3703],<br>CS antigen [ <i>Coccidioides posadasii</i> C735 delta SOWgp],<br>heat-stable antigen [ <i>Coccidioides immitis</i> RS]                      | AAB00101.1<br>KMU74303.1<br>XP_003065978.1<br>XP_001247410.1 |
| FLTAIDHSNSGFNIAK   | 19 kDa antigen [ <i>Coccidioides posadasii</i> ],<br>allergen Asp f 15 [ <i>Coccidioides immitis</i> RMSCC 3703],<br>CS antigen [ <i>Coccidioides posadasii</i> C735 delta SOWgp],<br>heat-stable antigen [ <i>Coccidioides immitis</i> RS]                      | AAB00101.1<br>KMU74303.1<br>XP_003065978.1<br>XP_001247410.1 |
| EIALWFSEGELIK      | nucleoside diphosphate kinase [ <i>Coccidioides immitis</i> RS]                                                                                                                                                                                                  | XP_001242666.1                                               |
| IVQSDAATLVR        | acetamidase [ <i>Coccidioides immitis</i> RMSCC 2394],<br>acetamidase, putative [ <i>Coccidioides posadasii</i> C735 delta SOWgp],<br>acetamidase [ <i>Coccidioides immitis</i> RS]                                                                              | KMP01873.1<br>XP_003065414.1<br>XP_001248096.1               |
| VYFDISIGNR         | peptidyl-prolyl cis-trans isomerase D [ <i>Coccidioides immitis</i> H538.4],<br>41 kDa peptidyl-prolyl cis-trans isomerase, putative [ <i>Coccidioides posadasii</i> C735 delta SOWgp],<br>peptidyl-prolyl cis-trans isomerase [ <i>Coccidioides immitis</i> RS] | KMU86947.1<br>XP_003067748.1<br>XP_001246138.1               |

---
